# Supplementary material
Source: publisher figshare collection journal article supplement (https://tandf.figshare.com/ndownloader/files/21961353)
Supplement: Supplementary file 1 [file 21961353]

**Table S1.** Pairwise correlations among the variables considered in the species distribution models.

|  | **Agricultural** | **Bio1** | **Bio4** | **Bio12** | **Bio15** | **Broadleaved** | **Altitude** | **Heterogeneous** | **Distance from rivers** | | **Road density** | **Urban** |
| --- | --- | --- | --- | --- | --- | --- | --- | --- | --- | --- | --- | --- |
| **Agricultural** | 1 | 0.395 | -0.390 | 0.027 | 0.039 | -0.315 | -0.341 | -0.087 | -0.031 | 0.067 | | 0.015 |
| **Bio1** |  | 1 | -0.548 | 0.447 | -0.336 | -0.225 | -0.907 | 0.227 | -0.009 | 0.177 | | 0.161 |
| **Bio4** |  |  | 1 | -0.307 | 0.242 | 0.334 | 0.401 | -0.122 | 0.002 | -0.008 | | -0.069 |
| **Bio12** |  |  |  | 1 | -0.743 | -0.008 | -0.114 | -0.037 | -0.003 | -0.062 | | 0.012 |
| **Bio15** |  |  |  |  | 1 | -0.043 | 0.043 | 0.094 | 0.003 | 0.159 | | 0.030 |
| **Broadleaved** |  |  |  |  |  | 1 | 0.389 | -0.098 | -0.056 | -0.084 | | -0.137 |
| **Altitude** |  |  |  |  |  |  | 1 | -0.152 | -0.012 | -0.118 | | -0.156 |
| **Heterogeneous** |  |  |  |  |  |  |  | 1 | -0.035 | 0.183 | | 0.033 |
| **Distance from rivers** |  |  |  |  |  |  |  |  | 1 | -0.045 | | -0.010 |
| **Road density** |  |  |  |  |  |  |  |  |  | 1 | | 0.692 |
| **Urban** |  |  |  |  |  |  |  |  |  |  | | 1 |
